# Supplementary material
Source: PubMed Central journal article supplement (PMC5823487)
Supplement: jp7b10515_si_001.pdf [file jp7b10515_si_001.pdf]

Supporting information for

## Atomic-Scale Structure of the Hematite $\alpha\text{-Fe}_2\text{O}_3(1\bar{1}02)$ “R-cut” Surface

Florian Kraushofer<sup>1</sup>, Zdenek Jakub<sup>1</sup>, Magdalena Bichler<sup>2</sup>, Jan Hulva<sup>1</sup>, Peter Drmota<sup>1</sup>, Michael Weinold<sup>1</sup>, Michael Schmid<sup>1</sup>, Martin Setvin<sup>1</sup>, Ulrike Diebold<sup>1</sup>, Peter Blaha<sup>2</sup>, Gareth S. Parkinson<sup>1\*</sup>

<sup>1</sup> *Institute of Applied Physics, Vienna University of Technology, Vienna, Austria.*

<sup>2</sup> *Institute of Materials Chemistry, Vienna University of Technology, Vienna, Austria.*

\* *parkinson@iap.tuwien.ac.at; +43 (1) 58801 13473*

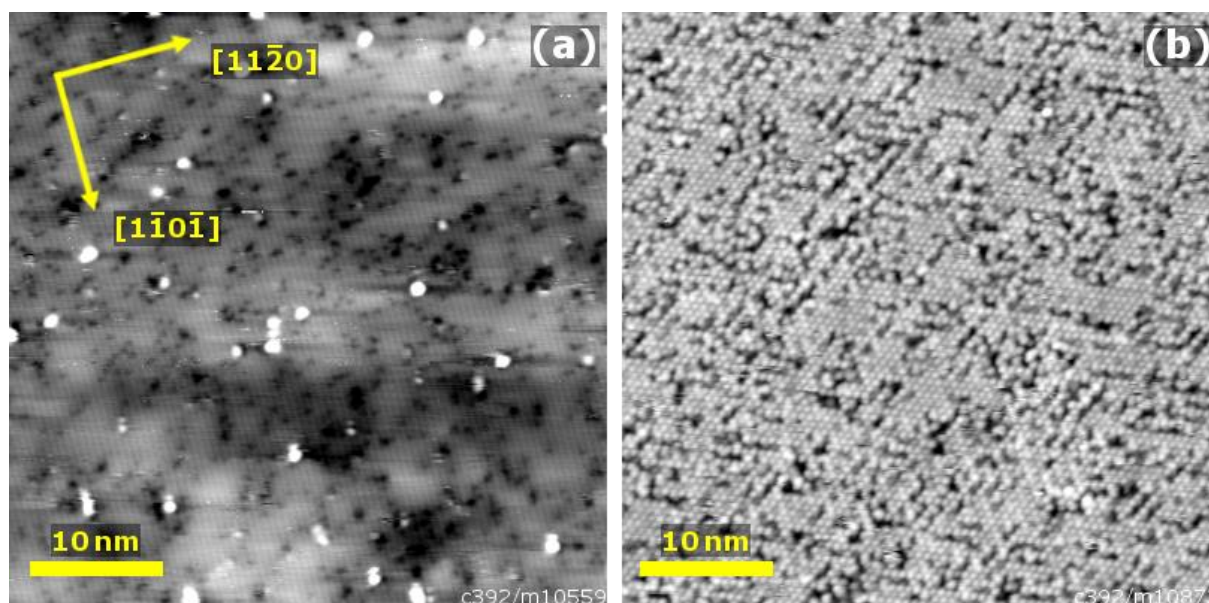

Figure S1: Larger-area STM images of the  $\alpha\text{-Fe}_2\text{O}_3(1\bar{1}02)$  surface with (a) (1×1) termination ( $45\times 45\text{ nm}^2$ ,  $U_{\text{sample}} = +3\text{ V}$ ,  $I_{\text{tunnel}} = 0.1\text{ nA}$ ) and (b) (2×1) termination ( $45\times 45\text{ nm}^2$ ,  $U_{\text{sample}} = -3\text{ V}$ ,  $I_{\text{tunnel}} = 0.1\text{ nA}$ ).

### Missing O row (2x1) reconstruction:

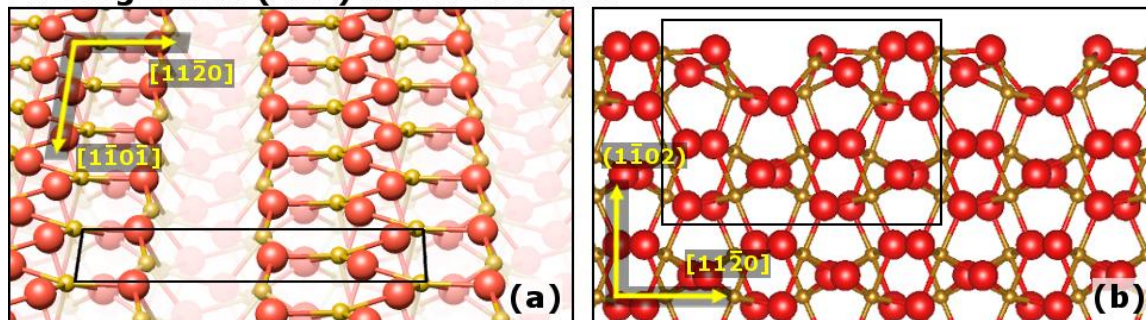

### 3 O vacancies (2x1) reconstruction:

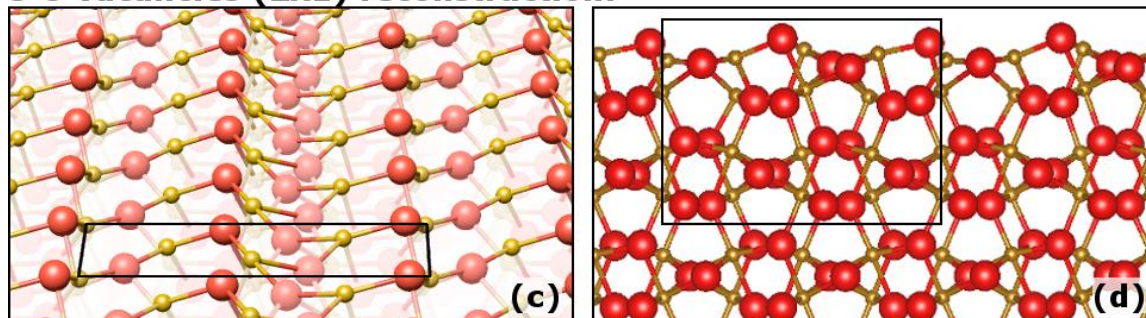

### Subsurface O vacancies (2x1) reconstruction:

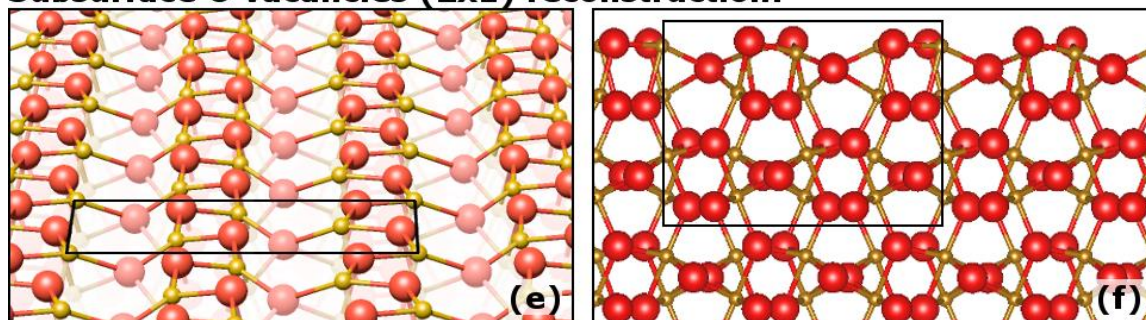

### Fe interstitials (2x1) reconstruction:

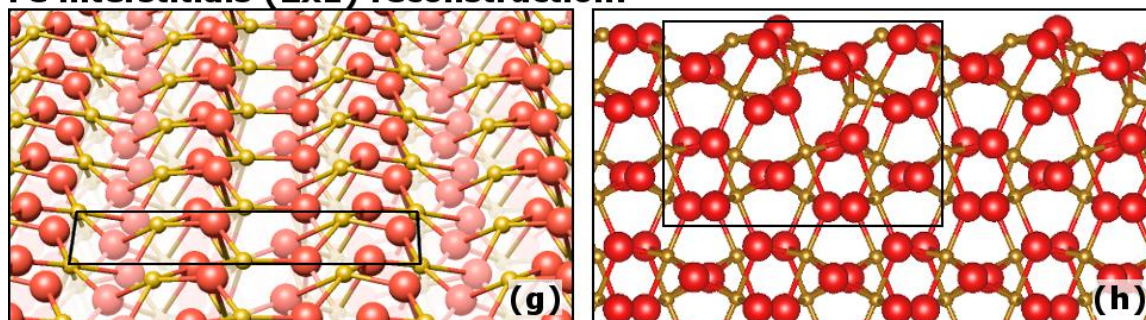

Figure S2: Minimum-energy configurations for (2x1) reconstruction models found to be energetically unfavourable, shown as dashed lines in Fig. 9. Panels (a,b) show a reconstruction model with every other layer-1 oxygen zigzag row removed, as suggested in ref. 1. The model shown in (c,d) is based on the alternating trench model (Fig. 10 (e,f)), with one additional layer-3 oxygen atom removed per (2x1) unit cell. The subsurface oxygen vacancy model in (e,f) is constructed in a similar fashion as the alternating trench model, but with oxygen removed from layer 3 instead of layer 1. Finally, (g,h) shows a model where one iron interstitial per (2x1) unit cell was introduced below layer 5.

The (1×1) and alternating trench (2×1) models in CIF file format are provided as separate files, which were created using VESTA.<sup>2</sup>

## References

1. Henderson, M. A., Low Temperature Oxidation of Fe<sup>2+</sup> Surface Sites on the (2×1) Reconstructed Surface of  $\alpha$ -Fe<sub>2</sub>O<sub>3</sub> (0112). *Surf. Sci.* **2010**, *604*, 1197-1201.
2. Momma, K.; Izumi, F., VESTA 3 for Three-Dimensional Visualization of Crystal, Volumetric and Morphology Data. *J. Appl. Crystallogr.* **2011**, *44*, 1272-1276.
